# Supplementary material
Source: ML conference proceedings conference paper supplement (https://proceedings.mlr.press/v80/huang18a.html)
Supplement: Supplementary file [file huang18a-supp.pdf]

**Supplementary Material for  
International Conference on Machine Learning (ICML 2018)**

Anonymous Authors<sup>1</sup>

**Lemma 1** (covariance error to projection error (modified)).

$$\|A - \pi_B^k(A)\|_F^2 \leq \|A - [A]_k\|_F^2 + 2k \cdot \|A^T A - B^T B\|_2.$$

*Proof.* For any  $x$  with  $\|x\| = 1$ , we have

$$\begin{aligned} \left| \|Ax\|^2 - \|Bx\|^2 \right| &= \left| x^T (A^T A - B^T B) x \right| \\ &\leq \|A^T A - B^T B\|_2 \end{aligned} \quad (1)$$

Let  $u_i$  and  $w_i$  be the  $i$ th right singular vector of  $B$  and  $A$  respectively

$$\begin{aligned} \|A - \pi_B^k(A)\|_F^2 &= \|A\|_F^2 - \|\pi_B^k(A)\|_F^2 \\ &= \|A\|_F^2 - \sum_{i=1}^k \|Au_i\|^2 \text{ Pathagorean theorem} \\ &\leq \|A\|_F^2 - \sum_{i=1}^k \|Bu_i\|^2 + k \cdot \|A^T A - B^T B\|_2 \\ &\quad \text{by Eq. (1)} \\ &\leq \|A\|_F^2 - \sum_{i=1}^k \|Bw_i\|^2 + k \cdot \|A^T A - B^T B\|_2 \\ &\quad \text{because } \sum_{i=1}^k \|Bw_i\|^2 \leq \sum_{i=1}^k \|Bu_i\|^2 \\ &\leq \|A\|_F^2 - \sum_{i=1}^k \|Aw_i\|^2 + 2k \cdot \|A^T A - B^T B\|_2 \\ &\quad \text{by Eq. (1)} \\ &= \|A - [A]_k\|_F^2 + 2k \cdot \|A^T A - B^T B\|_2. \end{aligned}$$

□

**Row sampling.**

**Theorem 1.** For any  $A \in \mathbb{R}^{n \times d}$  and  $F > 0$ , we sample each row  $A_i$  with probability  $p_i \geq \frac{\|A_i\|_2^2}{\alpha^2 F}$ ; if it is sampled,

<sup>1</sup>Anonymous Institution, Anonymous City, Anonymous Region, Anonymous Country. Correspondence to: Anonymous Author <anon.email@domain.com>.

Preliminary work. Under review by the International Conference on Machine Learning (ICML). Do not distribute.

scale it by  $1/\sqrt{p_i}$ . Let  $B$  be the (rescaled) sampled rows, then w.p. 0.99,  $\|A^T A - B^T B\|_2 \leq 10\alpha\sqrt{F}\|A\|_F$ , and  $\|B\|_F \leq 10\|A\|_F$ . The expected number of rows sampled is  $O(\frac{\|A\|_F^2}{\alpha^2 F})$ .

*Proof.* Since spectral norm is no larger than the Frobenius norm, it is sufficient to prove  $\|A^T A - B^T B\|_F \leq 10\alpha\sqrt{F}\|A\|_F$ .

For each  $j \in [n]$ , let

$$x_j = \begin{cases} 1 & \text{if the } j\text{th rows of } A \text{ is sampled} \\ 0 & \text{otherwise.} \end{cases}$$

We have  $(A^T A)_{i,j} = \sum_{t=1}^n a_{t,i} a_{t,j}$ , while

$$(B^T B)_{i,j} = \sum_{t=1}^n \frac{x_t^2 \cdot a_{t,i} a_{t,j}}{p_t}.$$

So  $E[(B^T B)_{i,j}] = (A^T A)_{i,j}$ . We also have

$$\begin{aligned} \text{Var}[(B^T B)_{i,j}] &= \text{Var} \left[ \sum_{t=1}^n \frac{x_t^2 \cdot a_{t,i} a_{t,j}}{p_t} \right] \\ &= \sum_{t=1}^n \frac{a_{t,i}^2 a_{t,j}^2 \cdot \text{Var}[x_t^2]}{p_t^2} \\ &\leq \sum_{t=1}^n \frac{a_{t,i}^2 a_{t,j}^2}{p_t}, \end{aligned}$$

where we use the fact  $\text{Var}[x_t^2] = p_t(1 - p_t) \leq p_t$ . So we have

$$\begin{aligned} E \left[ \left( (A^T A)_{i,j} - (B^T B)_{i,j} \right)^2 \right] &= \text{Var}[(B^T B)_{i,j}] \\ &\leq \sum_{t=1}^n \frac{a_{t,i}^2 a_{t,j}^2}{p_t}. \end{aligned}$$

Therefore,

$$\begin{aligned}
 \mathbb{E} [\|A^T A - B^T B\|_F^2] &= \sum_{i,j} \mathbb{E} \left[ \left( (A^T A)_{i,j} - (B^T B)_{i,j} \right)^2 \right] \\
 &\leq \sum_{i,j} \sum_{t=1}^n \frac{a_{t,i}^2 a_{t,j}^2}{p_t} \\
 &= \sum_{t=1}^n \frac{\|A_t\|^2 \|A_t\|^2}{p_t} \\
 &= \sum_{t=1}^n \alpha^2 F \|A_t\|^2 = \alpha^2 F \|A\|_F^2.
 \end{aligned}$$

We adjust  $\alpha$  by a constant, and using Markov's inequality

$$\Pr [\|A^T A - B^T B\|_F^2 \geq 100\alpha^2 F \|A\|_F^2] \leq 0.01,$$

which is equivalent to

$$\Pr [\|A^T A - B^T B\|_F \geq 10\alpha\sqrt{F}\|A\|_F] \leq 0.01.$$

The success probability can be boosted by a similar argument as in (?) via McDiarmid's inequality (see e.g. (?)).

It is not hard to verify that

$$\mathbb{E} [\|B\|_F^2] = \|A\|_F^2.$$

So by another Markov inequality, we prove the second part.  $\square$

### Input-sparsity time lower rank approximation algorithm.

**Theorem 2** (weak low rank approximation). *For any integers  $\ell, d$ , given  $A \in \mathbb{R}^{\ell \times d}$ , there is an algorithm that uses  $O(\text{nnz}(A) \log(1/\delta)) + \tilde{O}(\ell k^3)$  time and  $O(\ell(k^2 + \log \frac{1}{\delta}))$  space, and outputs a matrix  $Z \in \mathbb{R}^{O(k) \times \ell}$  with orthonormal rows such that with probability  $1 - \delta$ ,  $\|A - Z^T Z A\|_F^2 \leq O(1)\|A - [A]_k\|_F^2$ .*

*Proof.* Let  $J$  be a  $O(k) \times t_1$  matrix with iid Gaussian random variables, and  $C$  be a  $t_1 \times \ell$  sparse subspace embedding matrix (see (?) for details), with  $t_1 = O(k^2)$ . It was proved that, with constant probability, the column space of  $S = AC^T J^T$  contains a  $O(1)$  rank- $k$  approximation to  $A$  (see e.g., Lemma 4.2 and Remark 4.1 in (?)), moreover  $S = AC^T J^T$  can be computed in time  $O(\text{nnz}(A)) + O(\ell k^3)$ . In particular, let  $z_1, \dots, z_{O(k)}$  be the an orthonormal basis of the column space of  $S$ , then there exists  $X$  with  $\text{rank}(X) \leq k$  such that

$$\|A - Z^T X\|_F^2 \leq O(1)\|A - [A]_k\|_F^2,$$

where  $Z$  is the matrix whose rows are  $z_1, \dots, z_{O(k)}$ . Hence,

$$\begin{aligned}
 \|A - Z^T Z A\|_F^2 &\leq \|A - Z^T Z A\|_F^2 + \|Z^T Z A - Z^T X\|_F^2 \\
 &= \|A - Z^T X\|_F^2 \\
 &\leq O(1)\|A - [A]_k\|_F^2.
 \end{aligned}$$

Note that  $Z$  can be computed from  $S$  with  $O(\ell k^2)$ .

To boost the success probability to  $1 - \delta$ , we repeat the algorithm  $\gamma = \log(1/\delta)$  times, which compute  $Z^{(1)}, \dots, Z^{(\gamma)}$ , and pick the best one. This needs  $O(\text{nnz}(A) \log \frac{1}{\delta}) + \tilde{O}(\ell k^3)$  time. However, it will take too much time to compute  $\|A - Z^T Z A\|_F^2$ . To avoid this, we instead just compute a constant approximation using Johnson-Lindenstrauss Transform. Let  $\Phi \in \mathbb{R}^{t \times d}$  be a Johnson-Lindenstrauss matrix, where  $t = O(\log(\frac{d}{\delta^2}))$ . We have  $\Pr[\|\Phi x\| = O(1) \cdot \|x\|] \geq 1 - \frac{\delta^2}{d}$  for any fixed  $x$ . By union bound, with probability at least  $1 - \delta$ , it holds simultaneously for all  $i$  that

$$\|(I - Z^{(i)T} Z^{(i)}) A \Phi^T\|_F^2 = O(1)\|A - Z^{(i)T} Z^{(i)} A\|_F^2.$$

Note that  $A \Phi^T$  can be computed in  $O(\text{nnz}(A) \log \frac{d}{\delta})$  time. Given this, each  $\|(I - Z^{(i)T} Z^{(i)}) A \Phi^T\|_F^2$  can be computed in  $O(k \ell \log \frac{d}{\delta})$  time. So the total running time is  $O(\text{nnz}(A) \log \frac{d}{\delta}) + \tilde{O}(\ell k^3)$ . Since each  $Z^{(i)}$  is good with constant probability, with probability at least  $1 - \delta$ , there exists an  $i'$  such that

$$\|A - Z^{(i')T} Z^{(i')} A\|_F^2 \leq O(1)\|A - [A]_k\|_F^2.$$

Hence,

$$\|(I - Z^{(i')T} Z^{(i')}) A \Phi^T\|_F^2 = O(1)\|A - [A]_k\|_F^2.$$

Because we pick  $Z^{(j)}$  minimizing

$$\|(I - Z^{(j)T} Z^{(j)}) A \Phi^T\|_F^2,$$

with probability  $1 - \delta$ , then

$$\begin{aligned}
 \|(I - Z^{(j)T} Z^{(j)}) A\|_F^2 &= O(1)\|(I - Z^{(j)T} Z^{(j)}) A \Phi^T\|_F^2 \\
 &\leq \|(I - Z^{(i')T} Z^{(i')}) A \Phi^T\|_F^2 \\
 &= O(1)\|A - [A]_k\|_F^2,
 \end{aligned}$$

which proves the correctness.

For space, computing each  $S = AC^T J^T$  and  $Z$  needs  $O(\ell k^2)$  space. We do not store all  $Z^{(i)}$ , but compute one at a time. We only need to store the current best at any time, so this does not increase space. We also need to store  $A \Phi$ , which takes  $O(\ell \log \frac{d}{\delta})$  space.  $\square$
